# Supplementary material
Source: publisher site journal article supplement (https://www.degruyterbrill.com/publication/isbn/9783110229967/downloadAsset/9783110229967_Inhaltsverzeichnis.pdf)
Supplement: Supplementary file 1 [file 9783110229967_Inhaltsverzeichnis.pdf]

# Inhalt

|                                                                                              |     |
|----------------------------------------------------------------------------------------------|-----|
| Vor dem Diskurs – Prolog . . . . .                                                           | I   |
| 1 Begrenzungen und Entgrenzungen – zum systematischen Ort<br>der Diskurslinguistik . . . . . | 13  |
| 1.1 Von Wort und Satz zu Text und Diskurs . . . . .                                          | 17  |
| 1.1.1 Zur Unmöglichkeit der begrifflichen Fixierung von ›Diskurs‹                            | 18  |
| 1.1.2 Vom Satz zum Text . . . . .                                                            | 19  |
| 1.1.3 Ein autonomer Textbegriff durch Erweiterung . . . . .                                  | 21  |
| 1.1.4 Diskurslinguistik als Erweiterung der Textlinguistik . . . . .                         | 22  |
| 1.2 Vom Korpus zum Diskurs . . . . .                                                         | 25  |
| 1.2.1 Diskurslinguistik und Empirie . . . . .                                                | 27  |
| 1.2.2 Zur Abgrenzung von Korpuslinguistik und Diskurslinguistik                              | 28  |
| 1.2.3 Zur Verbindung von Korpuslinguistik und Diskurslinguistik                              | 32  |
| 1.3 Von der Sprache zum Wissen . . . . .                                                     | 40  |
| 1.3.1 Diskurslinguistischer Wissensbegriff . . . . .                                         | 41  |
| 1.3.2 Die diskursive Konstituierung von Wissen . . . . .                                     | 43  |
| 1.3.3 Das Problem der Referenz . . . . .                                                     | 48  |
| 1.3.4 Sprache und Wissen multifaktoriell . . . . .                                           | 50  |
| 1.3.5 Faktoren der diskursiven Konstituierung von Wissen . . . . .                           | 52  |
| 1.3.6 Funktionen der diskursiven Konstituierung von Wissen . . . . .                         | 57  |
| 1.3.7 Regulative der diskursiven Konstituierung von Wissen . . . . .                         | 60  |
| 1.3.8 Das Feldmodell der diskursiven Konstituierung von Wissen . . . . .                     | 63  |
| 2 Diskursverwirrungen – zur Heterogenität des Forschungsfeldes . . . . .                     | 65  |
| 2.1 Foucaults ›Verunklarung‹ . . . . .                                                       | 65  |
| 2.1.1 Der soziale und historische Ort von Wissen . . . . .                                   | 67  |
| 2.1.2 Diskurs als ›Formationssystem‹ . . . . .                                               | 69  |
| 2.1.3 Nichtdiskursive Praktiken und die Ordnung des Diskurses . . . . .                      | 72  |
| 2.1.4 Diskurs, Macht und Wissen . . . . .                                                    | 73  |
| 2.1.5 Foucault und die (Diskurs-)Linguistik . . . . .                                        | 75  |
| 2.2 Linguistische Lagerbildung . . . . .                                                     | 78  |
| 2.2.1 Diskurs und Wissen . . . . .                                                           | 81  |
| 2.2.2 Diskurs und Macht . . . . .                                                            | 97  |
| 2.2.3 Diskurs und Text . . . . .                                                             | 114 |
| 2.3 Versuch einer Entwirrung . . . . .                                                       | 117 |

|       |                                                                        |     |
|-------|------------------------------------------------------------------------|-----|
| 3     | Methodologie und Methoden – zur Praxis der Diskurslinguistik . . . . . | 121 |
| 3.1   | Linguistische Zugänge zum Diskurs . . . . .                            | 123 |
| 3.1.1 | Gegenstand diskurslinguistischer Untersuchungen . . . . .              | 124 |
| 3.1.2 | Methoden diskurslinguistischer Untersuchungen . . . . .                | 128 |
| 3.1.3 | Verfahrenspraxis diskurslinguistischer Untersuchungen . . .            | 132 |
| 3.2   | Ebenen der diskurslinguistischen Analyse . . . . .                     | 135 |
| 3.2.1 | Intratextuelle Analyse . . . . .                                       | 137 |
| 3.2.2 | Akteure . . . . .                                                      | 172 |
| 3.2.3 | Transtextuelle Analyse . . . . .                                       | 187 |
| 3.3   | DIMEAN . . . . .                                                       | 197 |
|       | Literatur . . . . .                                                    | 203 |
|       | Nachweise der Abbildungen und Tabellen . . . . .                       | 227 |
|       | Register . . . . .                                                     | 229 |
